# Supplementary material for: Serial-omics characterization of equine urine
Source: PLoS One. 2017 Oct 13;12(10):e0186258. doi: 10.1371/journal.pone.0186258 (PMC5640239; doi:10.1371/journal.pone.0186258)
Supplement: S3 Dataset — (XLS) [file pone.0186258.s003.xls]

## Sheet: Lipids for Table
Table III. Identified non-polar lipids from horse urine
Non-polar horse mare Lipids	Accession	Ion Formula	Avg MS1 Log10 Peak Area	Avg MS1 Peak Area	MS1 Peak Area[1]	MS1 Peak Area[2]	MS1 Peak Area[3]	Avg MS1 Peak Area
PA(16:0/18:1)-H	LMGP10010032	C37 H70 O8 N0 P1	7.47311	2.97242e+07	5.19542e+06	4.10278e+07	4.29493e+07	2.97242e+07
PA(18:0/18:1)-H	LMGP10010037	C39 H74 O8 N0 P1	6.74045	5.50105e+06	3.53113e+06	1.15377e+07	1.43436e+06	5.50105e+06
PE(16:0/16:0)+H	LMGP02010037	C37 H75 O8 N1 P1	6.84212	6.95213e+06	809691	1.73879e+07	2.65879e+06	6.95213e+06
PE(18:0/16:0)+H	LMGP02011205	C39 H79 O8 N1 P1	6.40746	2.55538e+06	2.72069e+06	2.82751e+06	2.11795e+06	2.55538e+06
PEt(16:0/14:0)-H	N/A	C35 H68 O8 N0 P1	6.61272	4.09941e+06	1.00304e+07	847218	1.42056e+06	4.09941e+06
TG(16:0/14:0/16:0)+NH4	LMGL03012786	C49 H98 O6 N1	6.22378	1.6741e+06	1.5903e+06	2.00528e+06	1.42672e+06	1.6741e+06
TG(16:0/16:0/16:0)+NH4	LMGL03010001	C51 H102 O6 N1	6.48031	3.0221e+06	2.85166e+06	3.95194e+06	2.26271e+06	3.0221e+06
TG(18:0/16:0/16:0)+NH4	LMGL03010004	C53 H106 O6 N1	6.2126	1.63156e+06	1.24115e+06	514422	3.13912e+06	1.63156e+06
TG(16:0/18:1/18:1)+NH4	LMGL03010100	C55 H106 O6 N1	6.41546	2.60293e+06	4.07977e+06	2.43948e+06	1.28954e+06	2.60293e+06
TG(18:1/18:1/18:1)+NH4	LMGL03012612	C57 H108 O6 N1	6.4025	2.52637e+06	1.43915e+06	3.57646e+06	2.5635e+06	2.52637e+06

## Sheet: LipidSearch identifications
#[c-1]:091516PSBSierraUreaLipid1.raw
#[s2-1]:091516PSBSierraUreaLipid2.raw
#[s1-1]:091516PSBSierraUreaLipid3.raw
#normalize base:
#control group:c
#toprank filter:true
#mScoreThreshold:5.0
#cScoreThreshold:2.0
LipidIon	Class		FattyAcid	FA1	FA2	FA3	CalcMz	IonFormula	ARatio[s1/c]	ARatio[s2/c]	HRatio[s1/c]	HRatio[s2/c]	ADiff[s1/c]	ADiff[s2/c]	HDiff[s1/c]	HDiff[s2/c]	GroupArea[c]	GroupArea[s1]	GroupArea[s2]	GroupHeight[c]	GroupHeight[s1]	GroupHeight[s2]	GroupTopPos[c]	GroupTopPos[s1]	GroupTopPos[s2]	Area[c-1]	Area[s2-1]	Area[s1-1]	Height[c-1]	Height[s2-1]	Height[s1-1]	NormArea[c-1]	NormArea[s2-1]	NormArea[s1-1]	NormHeight[c-1]	NormHeight[s2-1]	NormHeight[s1-1]	TopPos[c-1]	TopPos[s2-1]	TopPos[s1-1]	Hwhm(L)[c-1]	Hwhm(L)[s2-1]	Hwhm(L)[s1-1]	Hwhm(R)[c-1]	Hwhm(R)[s2-1]	Hwhm(R)[s1-1]	AreaScore[c-1]	AreaScore[s2-1]	AreaScore[s1-1]
PA(16:0/18:1)-H	PA	LMGP10010032	(16:0/18:1)	(16:0)	(18:1)		673.481	C37 H70 O8 N0 P1	8.26676	7.89692	1.35705	1.67305	3.77539e+07	3.58324e+07	74964.6	141308	5.19542e+06	4.29493e+07	4.10278e+07	209953	284917	351261	30.04	30.04	30.04	5.19542e+06	4.10278e+07	4.29493e+07	209953	351261	284917	5.19542e+06	4.10278e+07	4.29493e+07	209953	351261	284917	30.04	30.142	30.327	0.22	0.834	1.086	0.168	0.995	1.275	0.55	0.7	0.81
PA(18:0/18:1)-H	PA	LMGP10010037	(18:0/18:1)	(18:0)	(18:1)		701.513	C39 H74 O8 N0 P1	0.406203	3.26741	0.564569	1.58236	-2.09678e+06	8.00652e+06	-77981.1	104294	3.53113e+06	1.43436e+06	1.15377e+07	179090	101109	283384	29.995	29.995	29.995	3.53113e+06	1.15377e+07	1.43436e+06	179090	283384	101109	3.53113e+06	1.15377e+07	1.43436e+06	179090	283384	101109	30.333	30.131	29.995	0.144	0.281	0.125	0.164	0.356	0.097	0.55	0.22	0.65
PE(16:0/16:0)+H	PE	LMGP02010037	(16:0/16:0)	(16:0)	(16:0)		692.522	C37 H75 O8 N1 P1	3.28371	21.4748	2.37269	2.98479	1.8491e+06	1.65782e+07	199390	288299	809691	2.65879e+06	1.73879e+07	145255	344644	433554	30.478	30.478	30.478	809691	1.73879e+07	2.65879e+06	145255	433554	344644	809691	1.73879e+07	2.65879e+06	145255	433554	344644	30.935	30.478	30.585	0.046	0.353	0.053	0.041	0.275	0.068	0.74	0.5	0.71
PE(18:0/16:0)+H	PE	LMGP02011205	(18:0/16:0)	(18:0)	(16:0)		720.554	C39 H79 O8 N1 P1	0.77846	1.03926	0.852926	1.02607	-602742	106823	-40909.2	7252.65	2.72069e+06	2.11795e+06	2.82751e+06	278154	237245	285407	30.415	30.415	30.415	2.72069e+06	2.82751e+06	2.11795e+06	278154	285407	237245	2.72069e+06	2.82751e+06	2.11795e+06	278154	285407	237245	30.521	30.482	30.415	0.08	0.083	0.072	0.073	0.072	0.068	0.38	0.66	0.62
PEt(16:0/14:0)-H	PEt		(16:0/14:0)	(16:0)	(14:0)		647.466	C35 H68 O8 N0 P1	0.141624	0.0844646	0.63539	0.746918	-8.60989e+06	-9.18323e+06	-81731.6	-56731.1	1.00304e+07	1.42056e+06	847218	224161	142430	167430	29.957	29.957	29.957	1.00304e+07	847218	1.42056e+06	224161	167430	142430	1.00304e+07	847218	1.42056e+06	224161	167430	142430	29.99	29.839	29.957	0.4	0	0.079	0.301	0	0.077	0.3	1	0.7
TG(16:0/14:0/16:0)+NH4	TG	LMGL03012786	(16:0/14:0/16:0)	(16:0)	(14:0)	(16:0)	796.739	C49 H98 O6 N1	0.897138	1.26095	0.758151	0.954791	-163581	414981	-62754.8	-11730.9	1.5903e+06	1.42672e+06	2.00528e+06	259480	196725	247749	29.174	29.174	29.174	1.5903e+06	2.00528e+06	1.42672e+06	259480	247749	196725	1.5903e+06	2.00528e+06	1.42672e+06	259480	247749	196725	29.182	29.174	29.116	0.039	0.086	0.042	0.057	0.041	0.071	0.9	0.85	0.91
TG(16:0/16:0/16:0)+NH4	TG	LMGL03010001	(16:0/16:0/16:0)	(16:0)	(16:0)	(16:0)	824.77	C51 H102 O6 N1	0.793469	1.38584	1.0325	1.13667	-588957	1.10027e+06	8834.61	37154.9	2.85166e+06	2.26271e+06	3.95194e+06	271849	280684	309004	29.656	29.656	29.656	2.85166e+06	3.95194e+06	2.26271e+06	271849	309004	280684	2.85166e+06	3.95194e+06	2.26271e+06	271849	309004	280684	29.666	29.656	29.669	0.071	0.124	0.067	0.094	0.076	0.059	0.76	0	0.87
TG(18:0/16:0/16:0)+NH4	TG	LMGL03010004	(18:0/16:0/16:0)	(18:0)	(16:0)	(16:0)	852.801	C53 H106 O6 N1	2.5292	0.414473	1.56235	0.435139	1.89797e+06	-726726	121168	-121709	1.24115e+06	3.13912e+06	514422	215468	336636	93758.4	30.323	30.323	30.323	1.24115e+06	514422	3.13912e+06	215468	93758.4	336636	1.24115e+06	514422	3.13912e+06	215468	93758.4	336636	30.271	30.311	30.323	0	0.042	0.102	0	0.044	0.044	1	0.95	0.86
TG(16:0/18:1/18:1)+NH4	TG	LMGL03010100	(16:0/18:1/18:1)	(16:0)	(18:1)	(18:1)	876.801	C55 H106 O6 N1	0.316081	0.597945	0.630122	0.980081	-2.79023e+06	-1.64029e+06	-110109	-5929.77	4.07977e+06	1.28954e+06	2.43948e+06	297690	187581	291761	29.582	29.582	29.582	4.07977e+06	2.43948e+06	1.28954e+06	297690	291761	187581	4.07977e+06	2.43948e+06	1.28954e+06	297690	291761	187581	29.591	29.582	29.538	0.125	0.07	0.066	0.09	0.061	0.042	0.86	0	0.72
TG(18:1/18:1/18:1)+NH4	TG	LMGL03012612	(18:1/18:1/18:1)	(18:1)	(18:1)	(18:1)	902.817	C57 H108 O6 N1	2.5635e+06	3.57646e+06	1.30273	0.997681	2.5635e+06	3.57646e+06	58172.4	-445.539	0	2.5635e+06	3.57646e+06	192161	250333	191715	29.513	29.513	29.513	1.43915e+06	3.57646e+06	2.5635e+06	194040	191715	250333	0	3.57646e+06	2.5635e+06	192161	191715	250333	29.664	29.513	29.506	0	0	0	0	0	0	1	1	1
[truncated: 30 more columns]

## Sheet: Sheet1
	Lipid Class	# Unique Lipids
	Glycerophospholipids	5
	Triacylglycerides	5
